# Supplementary material
Source: PubMed Central journal article supplement (PMC3277240)
Supplement: mt2011245x1.pdf [file mt2011245x1.pdf]

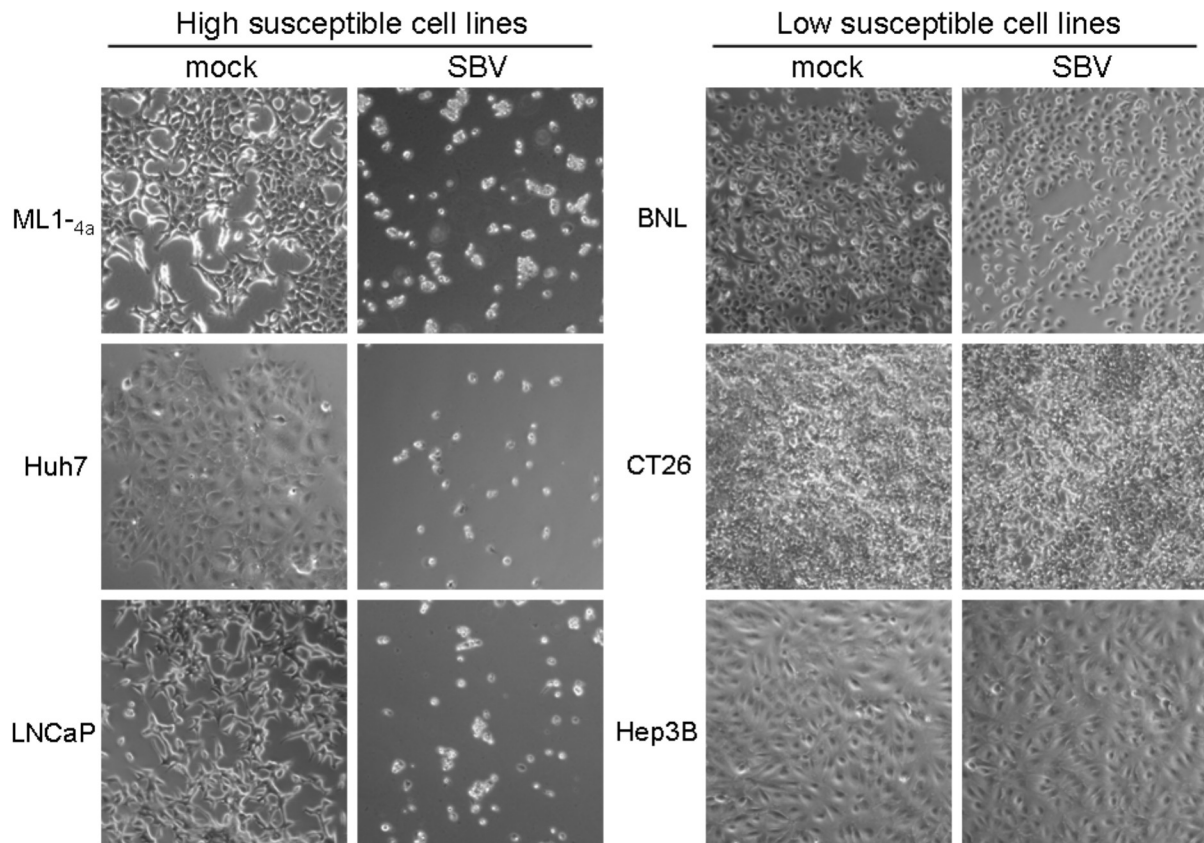

**Figure S1. Images of SBV-induced cytopathology of representative cell lines.**

Cells were left uninfected (mock) or infected with SBV at an MOI of 5 and photographed 48 h after virus infection.
