# Supplementary material
Source: PubMed Central journal article supplement (PMC3277240)
Supplement: mt2011245x2.pdf [file mt2011245x2.pdf]

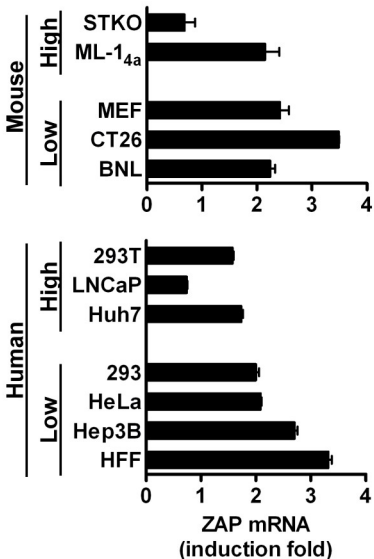

**Figure S2. Induction folds of ZAP mRNA expression upon IFN- $\alpha$  stimulation.**

Representative mouse and human cell lines with extremely low or high susceptibilities to SBV infection were examined for the presence of intact IFN signaling upon IFN- $\alpha$  stimulation. Cells were left untreated or treated with IFN- $\alpha$  (100 IU/ml) for 24 h. Total RNA was isolated from the control or IFN- $\alpha$ -treated cells, and the levels of ZAP mRNA were determined by qRT-PCR. The results are expressed as fold induction, with the ZAP mRNA levels of IFN- $\alpha$ -treated cells divided by those of the control cells.
