# Supplementary material
Source: PubMed Central journal article supplement (PMC3277240)
Supplement: mt2011245x3.pdf [file mt2011245x3.pdf]

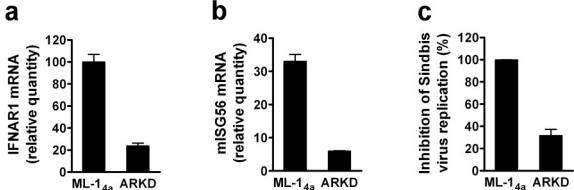

**Figure S3. Establishment of the IFN signaling-defective ML-1<sub>4a</sub> tumor cell line ARKD.** The IFN signaling-defective ML-1<sub>4a</sub> tumor cell line ARKD was established by lentiviral transduction of shRNA targeting IFNAR1. (a) The mRNA levels of IFNAR1 and (b) the mRNA levels of ISG56 in ARKD cells upon IFN- $\alpha$  induction (100 IU/ml, 24h) were analyzed by qRT-PCR. (c) ARKD cells were treated with IFN- $\alpha$  and examined for their abilities to inhibit SBV replication.
