# Supplementary material
Source: PubMed Central journal article supplement (PMC3277240)
Supplement: mt2011245x4.pdf [file mt2011245x4.pdf]

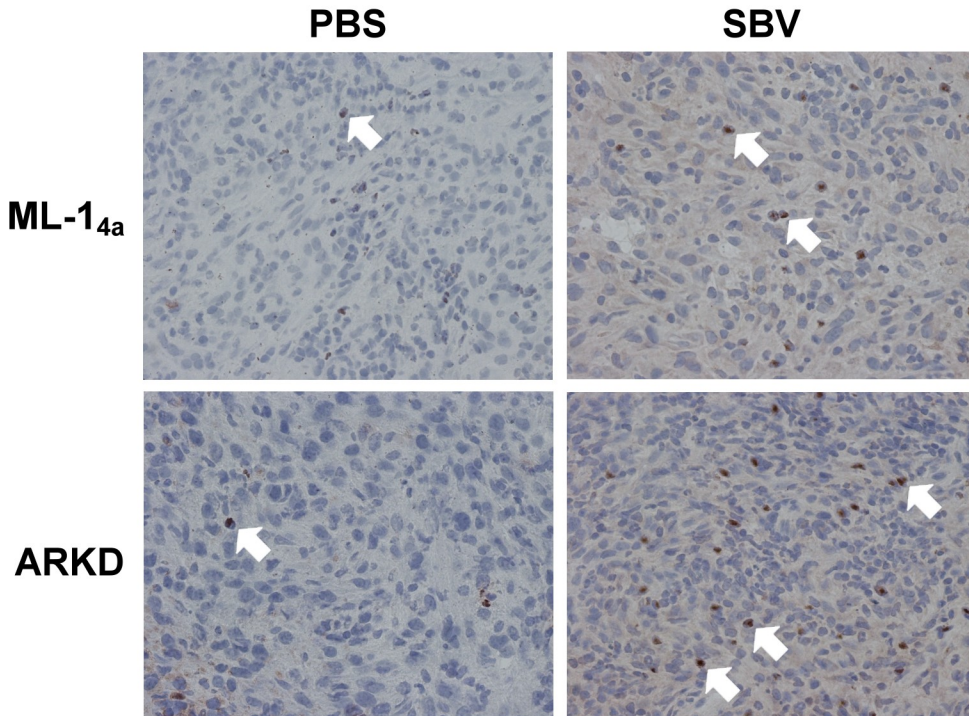

**Figure S4. TUNEL analysis of apoptotic cells in tumor tissues.**

Representative pictures show the TUNEL analyses of the tumor tissues from the animals treated with PBS or SBV. Images are shown at x400 magnification. White arrows indicate apoptotic cells.
