# Supplementary material
Source: PubMed Central journal article supplement (PMC3277240)
Supplement: mt2011245x5.pdf [file mt2011245x5.pdf]

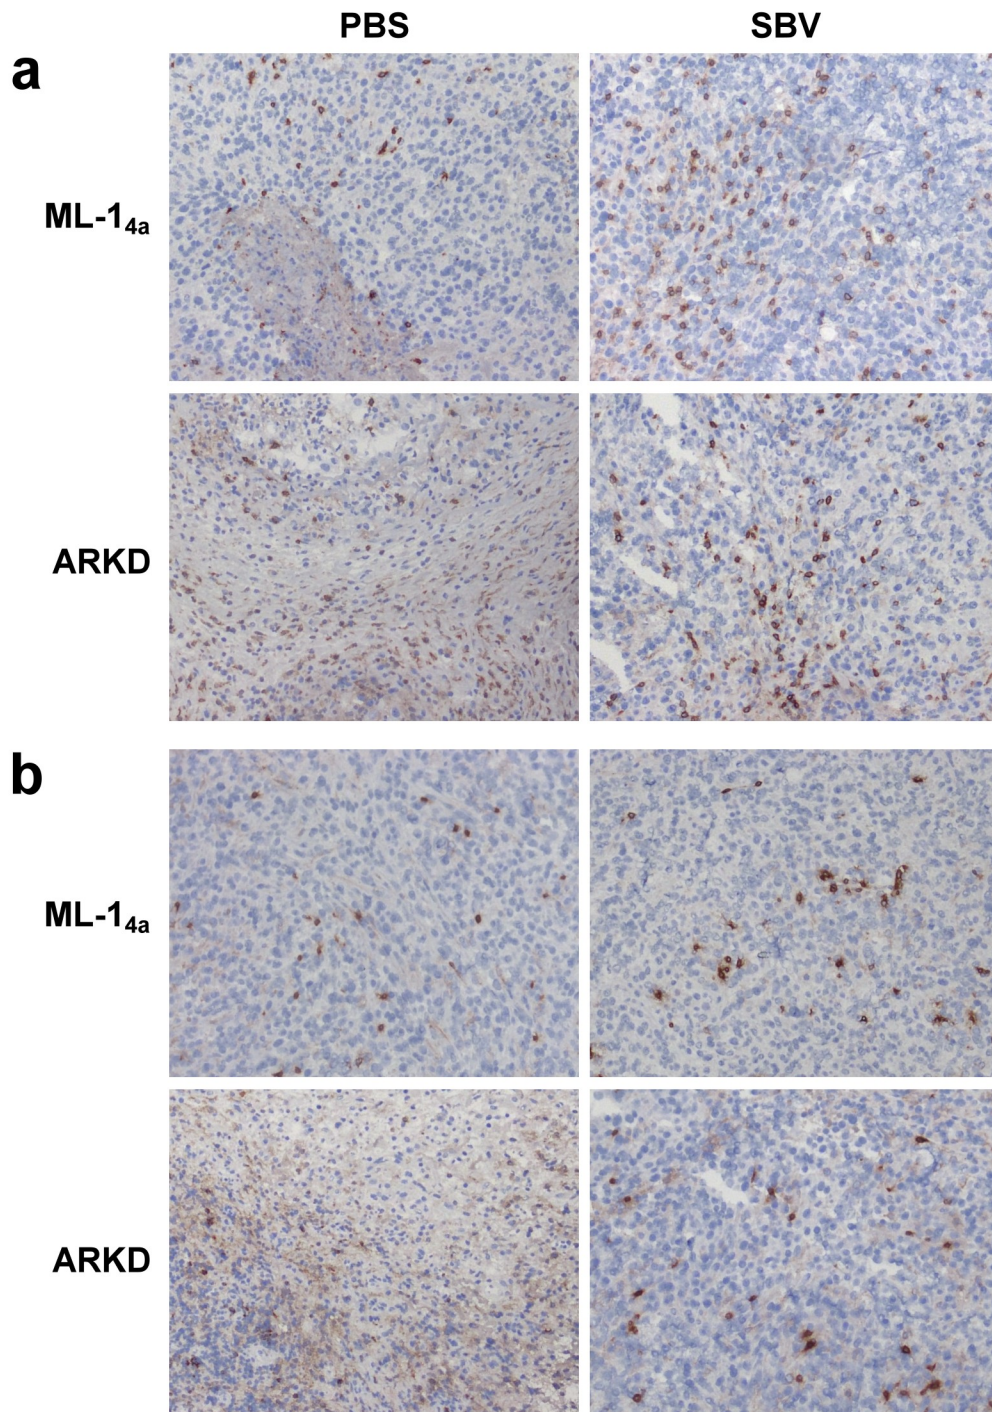

**Figure S5. Infiltration of CD8<sup>+</sup> and CD4<sup>+</sup> T cells in tumor tissues.**

Representative pictures show the immunohistochemical analyses of the tumor tissues from the animals treated with PBS or SBV. (a) CD8<sup>+</sup> T cells; (b) CD4<sup>+</sup> T cells. Images are shown at x200 magnification.
