# Supplementary material
Source: PubMed Central journal article supplement (PMC3277240)
Supplement: mt2011245x6.pdf [file mt2011245x6.pdf]

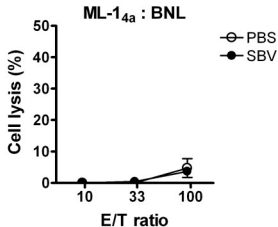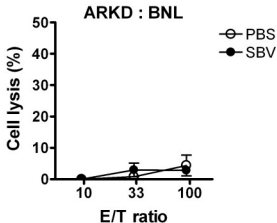

**Figure S6. Syngenic BNL hepatoma cells were used as a control for CTL specificity.** Mouse splenocytes were prepared from the mice bearing ML-1<sub>4a</sub> or ARKD tumors. They were stimulated with mitomycin C-treated respective tumor cells for 5 days. The stimulated splenocytes were recovered and incubated with fresh BNL cells for 4 h at the indicated E/T ratios. CTL activity was determined by lactate dehydrogenase release assays.
