# Supplementary material
Source: PubMed Central journal article supplement (PMC3277240)
Supplement: mt2011245x7.pdf [file mt2011245x7.pdf]

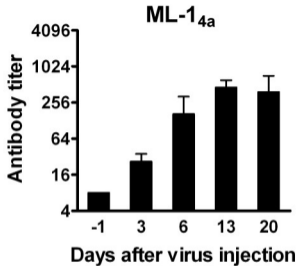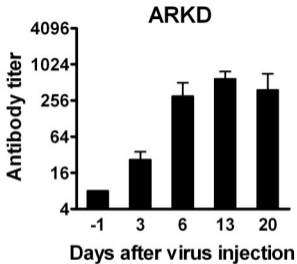

**Figure S7. Production of neutralizing antibodies in tumor-bearing mice after virotherapy.** Mice bearing ML-1<sub>4a</sub> tumors or ARKD tumors were treated with a single dose of SBV. Mouse sera were collected at the time indicated and the levels of antiviral neutralizing antibodies were determined by plaque reduction neutralization test (PRNT).
