# Supplementary material
Source: PubMed Central journal article supplement (PMC3277240)
Supplement: mt2011245x8.pdf [file mt2011245x8.pdf]

**Table S1 Sequences of primers used for quantitative RT-PCR analysis**

---

| Primer                       | Sequences (5' to 3')    |
|------------------------------|-------------------------|
| Mouse IFN- $\beta$ Forward   | AGGGCGGACTTCAAGATC      |
| Mouse IFN- $\beta$ Reverse   | CTCATTCACCCAGTGCT       |
| Mouse ISG56 Forward          | TGCTTTGCGAAGGCTCTGAAA   |
| Mouse ISG56 Reverse          | TTCTGGATTTAACCGGACAGC   |
| Mouse ZAP Forward            | TGCCCACTTGGATGGACTTTC   |
| Mouse ZAP Reverse            | GGGCTCTCATGCCCATACTG    |
| Mouse IFNAR1 Forward         | AGCCACGGAGAGTCAATGG     |
| Mouse IFNAR1 Reverse         | GCTCTGACACGAAACTGTGTTTT |
| Mouse $\beta$ -actin Forward | GGCTGTATTCCCCTCCATCG    |
| Mouse $\beta$ -actin Reverse | CCAGTTGGTAACAATGCCATGT  |
| Human IFN- $\beta$ Forward   | ATTGCTCTCCTGTTGTGCTT    |
| Human IFN- $\beta$ Reverse   | TTCCTCAGGGATGTCAAAGT    |
| Human ISG56 Forward          | TCCCCTAAGGCAGGCTGTC     |
| Human ISG56 Reverse          | GACATGTTGGCTAGAGCTTCTTC |
| Human ZAP Forward            | GTCCACTTCCATCTGCCTTACCG |
| Human ZAP Reverse            | GGCGTCGGATGGGAAAGGAA    |
| Human GAPDH Forward          | GAAGGTGAAGGTCGGAGTC     |
| Human GAPDH Reverse          | GAAGATGGTGATGGGATTTC    |

---
